# Supplementary material for: Bagasse as a carbon structure with high sulfur content for lithium–sulfur batteries
Source: Royal Society of Chemistry journal article supplement (doi:10.1039/d0ra01485k), 2020-01-01
Supplement: d0ra01485k1.pdf [file d0ra01485k1.pdf]

## Begasse as a carbon structure with high sulfur content for lithium-sulfur battery

Jingjing Ma<sup>a</sup>, Li Yang<sup>a</sup>, Xiaoxun Yang<sup>a</sup>, Yuanchao Li<sup>a</sup>, Erqing Zhao<sup>a</sup>, Shumin Fan<sup>a</sup>, Guangri Xu<sup>a</sup>,

Tianjun Lou<sup>a</sup>, and Hongying Niu<sup>\*a</sup>

College of Chemistry and Chemical Engineering, Henan Institute of Science and Technology, Xinxiang,

453003, P. R. China.

Corresponding author: Hongying Niu

E-mail address: [hongying\\_niu1974@163.com](mailto:hongying_niu1974@163.com)

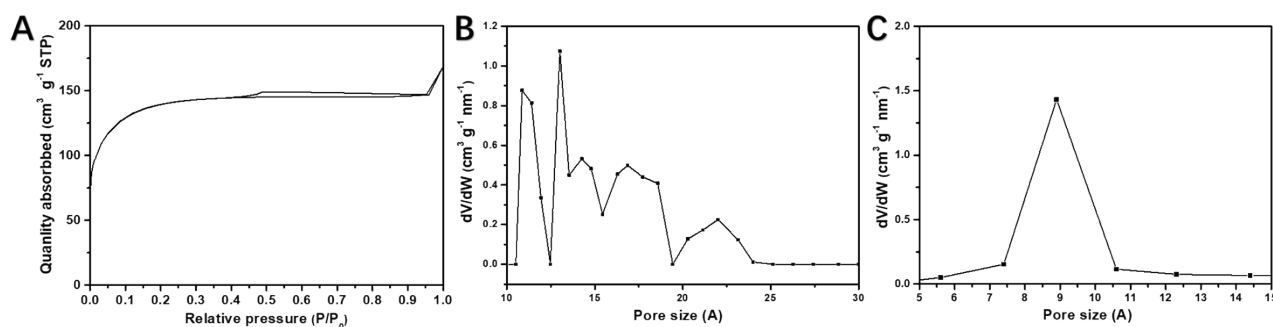

Fig.S1 N<sub>2</sub> adsorption/desorption isotherms (A) of S/CNT; Pore size distribution plots calculated by H-K (B) and DFT (C) of S/CNT

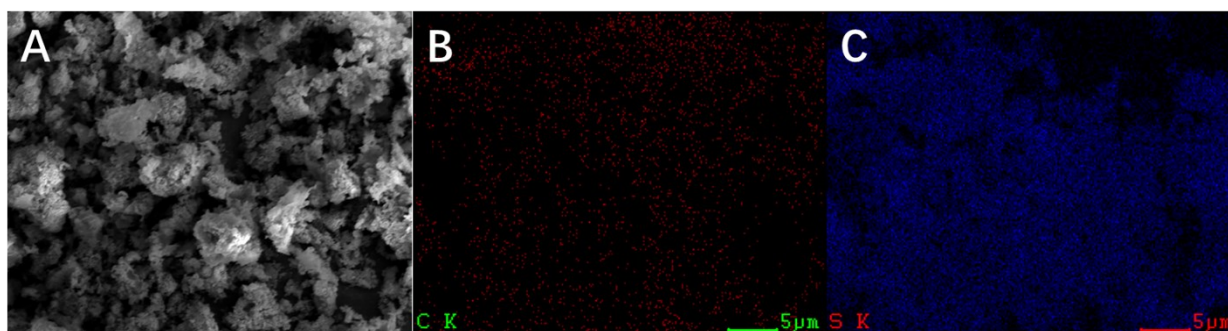

Fig.S2 SEM images of S/BC (A) and the corresponding C (B) and S (C) elemental mappings

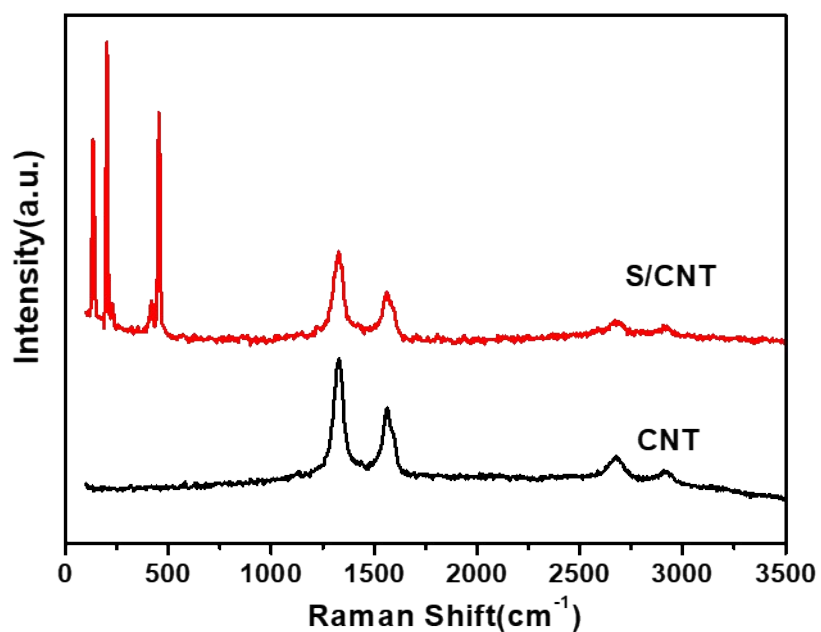

Fig.S3 Raman spectra of CNT and S/CNT

Table S1. Summary of some publications of natural materials used for the Li-S battery

| Sample name           | Sulfur Content (wt%) | First reversible specific capacity (mAh/g) | Capacity retention (mAh/g) | Cycle number | Ref       |
|-----------------------|----------------------|--------------------------------------------|----------------------------|--------------|-----------|
| S/NMPC                | 63                   | 1327                                       | 757                        | 100(0.1C)    | 1         |
| S/NMPC                | 63                   | 1327                                       | 624                        | 100(1C)      | 1         |
| S/NBC-15              | 56                   | 1169                                       | 898                        | 200(0.2C)    | 2         |
| S/NBC-15              | 56                   | 1098                                       | 682                        | 500(0.5C)    | 2         |
| Pomelo peel carbon    | 60                   | 1258                                       | 750                        | 100(0.2C)    | 3         |
| Starch derived carbon | 81.29                | 922                                        | 683                        | 100(0.5C)    | 4         |
| Spent coffee carbon   | 47.6                 | 1150                                       | 613                        | 100(0.2C)    | 5         |
| N/BC                  | 68.8                 | 1360                                       | 790                        | 200(0.2C)    | This work |
| N/BC                  | 68.8                 |                                            | 601                        | 150(1C)      | This work |

Table S2. The Nyquist plots of S/BC and S/CNT

| Conditions and parameters | S/BC                           | S/CNT |
|---------------------------|--------------------------------|-------|
| At the 1st                | <b>Re(<math>\Omega</math>)</b> | 2.9   |
|                           | <b>Rc(<math>\Omega</math>)</b> | 11.3  |
| At the 10th               | <b>Re(<math>\Omega</math>)</b> | 3.5   |
|                           | <b>Rc(<math>\Omega</math>)</b> | 277.5 |

## References

1. Y. Zhao, X. Zhang, Y. He, N. Liu, T. Tan and C. Liang, *Materials*, 2017, **10**, 1158.
2. D. B. Babu and K. Ramesha, *Carbon*, 2019, **144**, 582-590.
3. J. Zhang, J. Xiang, Z. Dong, Y. Liu, Y. Wu, C. Xu and G. Du, *Electrochimica Acta*, 2014, **116**, 146-151.
4. J. Li, F. Qin, L. Zhang, K. Zhang, Q. Li, Y. Lai, Z. Zhang and J. Fang, *Journal of Materials Chemistry A*, 2014, **2**, 13916-13922.
5. Y. Zhao, L. Wang, L. Huang, M. Maximov, M. Jin, Y. Zhang, X. Wang and G. Zhou, *Nanomaterials*, 2017, **7**, 402.
